# Supplementary material for: Role of miR‐466 in mesenchymal stromal cell derived extracellular vesicles treating inoculation pneumonia caused by multidrug‐resistant Pseudomonas aeruginosa
Source: PubMed Central journal article supplement (PMC7805403; doi:10.1002/ctm2.287), 2021-01-13

# Supplementary Figure S9

A

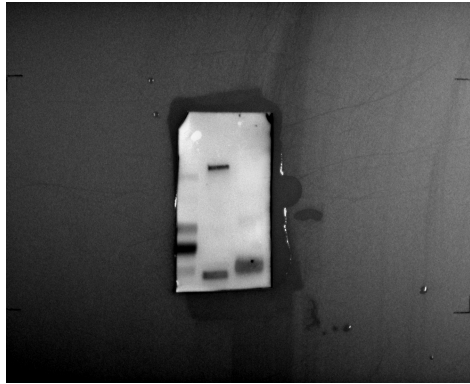

CD9

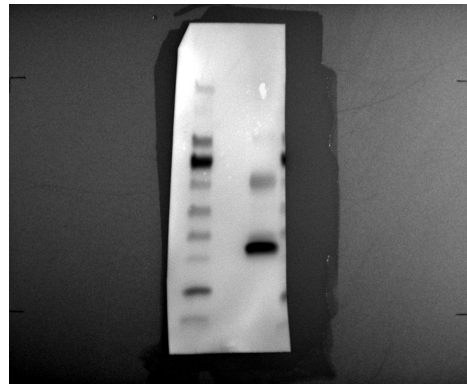

CD63

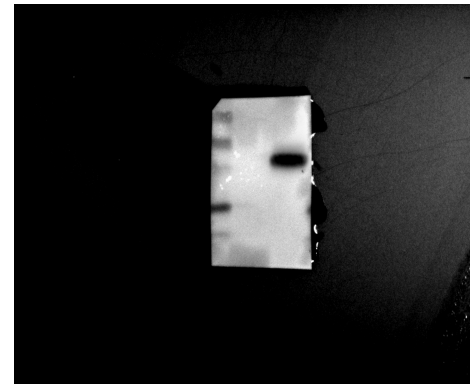

TSG101

**B**

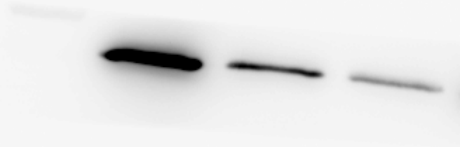

MyD88

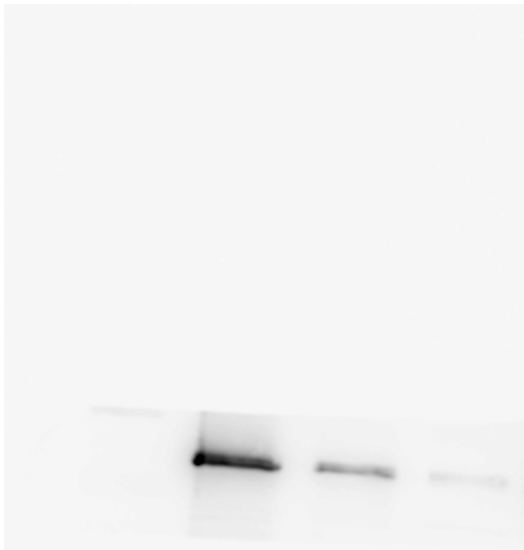

p65

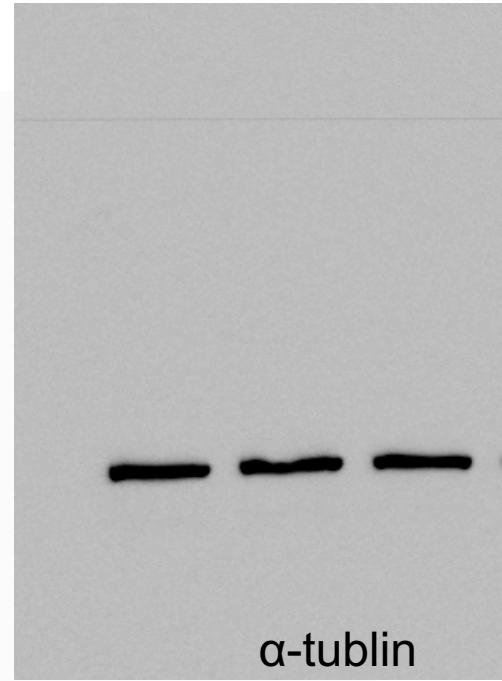

$\alpha$ -tubulin

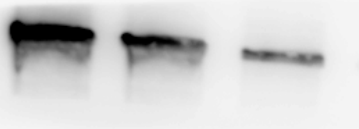

TIRAP

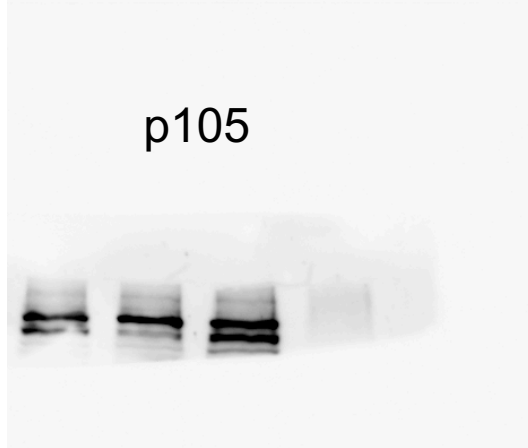

p105

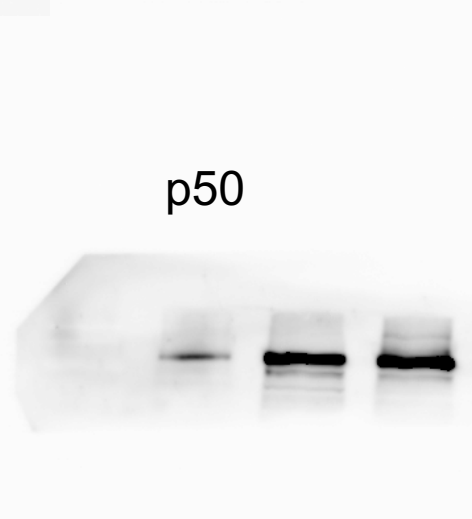

p50

C

NS

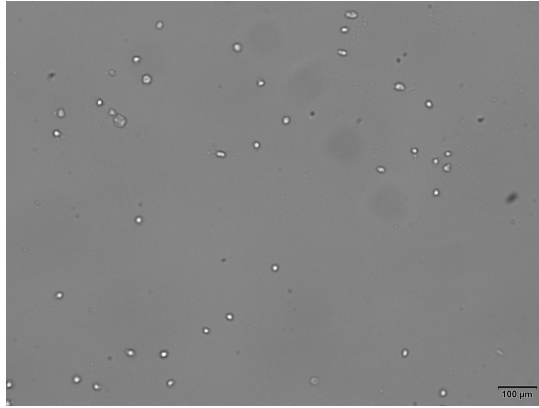

DAPI

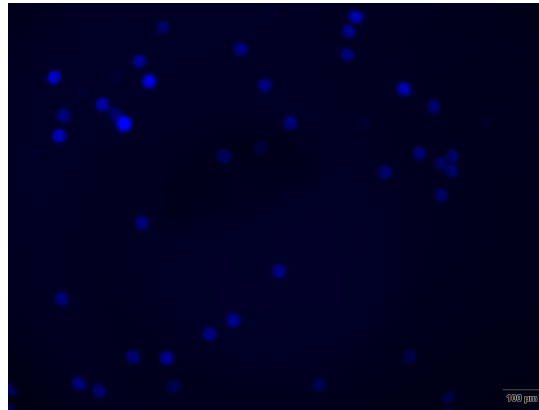

Dil-EVs

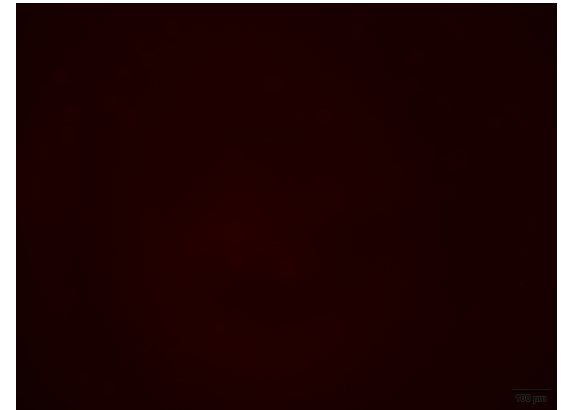

D

DAPI

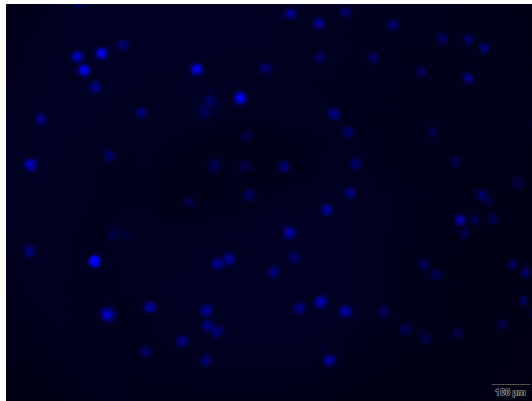

Dil-EVs

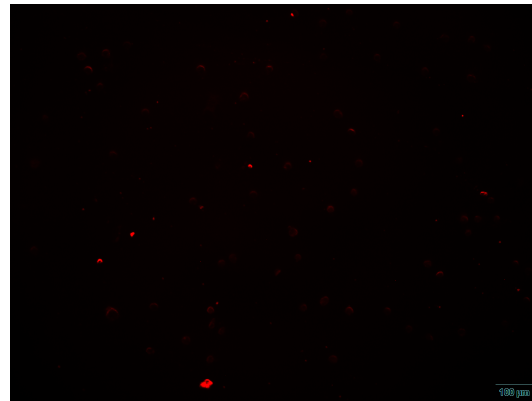

Merge

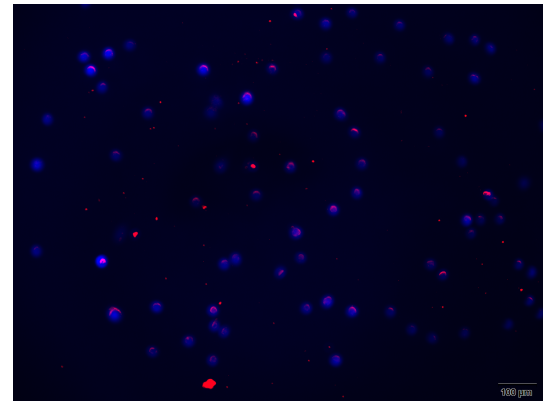

Supplement: CTM2-11-e287-s006.pdf [file CTM2-11-e287-s006.pdf]
